# Supplementary material for: The impact of primary mental healthcare on core symptoms of depression among underrepresented adolescents: A network analysis perspective
Source: Research Square preprint supplement (doi:10.21203/rs.3.rs-6176772/v1), 2025-04-03
Supplement: Supplementary file 1 [file 588e86117c613455c04be37c.docx]

Table 1S Edge weights of depressive symptom network from the first round

|  | C1 | C2 | C3 | C4 | C5 | C6 | C7 | C8 | C9 | C10 | C11 | C12 | C13 | C14 | C15 | C16 | C17 | C18 | C19 | C20 |
| --- | --- | --- | --- | --- | --- | --- | --- | --- | --- | --- | --- | --- | --- | --- | --- | --- | --- | --- | --- | --- |
| C1 |  |  |  |  |  |  |  |  |  |  |  |  |  |  |  |  |  |  |  |  |
| C2 | 0.102 |  |  |  |  |  |  |  |  |  |  |  |  |  |  |  |  |  |  |  |
| C3 | 0.186 | 0.115 |  |  |  |  |  |  |  |  |  |  |  |  |  |  |  |  |  |  |
| C4 | 0.117 | 0.035 | 0.106 |  |  |  |  |  |  |  |  |  |  |  |  |  |  |  |  |  |
| C5 | 0.059 | 0.022 | 0.020 | 0.112 |  |  |  |  |  |  |  |  |  |  |  |  |  |  |  |  |
| C6 | 0.160 | 0.037 | 0.118 | 0.075 | 0.048 |  |  |  |  |  |  |  |  |  |  |  |  |  |  |  |
| C7 | 0.024 | 0.031 | 0.040 | 0.078 | 0.235 | 0.122 |  |  |  |  |  |  |  |  |  |  |  |  |  |  |
| C8 | 0.000 | 0.000 | 0.000 | 0.093 | 0.107 | 0.024 | 0.123 |  |  |  |  |  |  |  |  |  |  |  |  |  |
| C9 | 0.000 | 0.000 | 0.020 | 0.078 | 0.019 | 0.018 | 0.084 | 0.449 |  |  |  |  |  |  |  |  |  |  |  |  |
| C10 | 0.008 | 0.024 | 0.028 | 0.037 | 0.010 | 0.047 | 0.067 | 0.025 | 0.094 |  |  |  |  |  |  |  |  |  |  |  |
| C11 | 0.032 | 0.134 | 0.013 | 0.000 | 0.072 | 0.019 | 0.043 | 0.000 | 0.000 | 0.060 |  |  |  |  |  |  |  |  |  |  |
| C12 | 0.110 | 0.010 | 0.054 | 0.000 | 0.000 | 0.230 | 0.040 | 0.000 | 0.024 | 0.082 | 0.082 |  |  |  |  |  |  |  |  |  |
| C13 | -0.013 | 0.041 | 0.006 | 0.000 | 0.012 | 0.032 | 0.039 | 0.000 | 0.000 | 0.017 | 0.063 | 0.085 |  |  |  |  |  |  |  |  |
| C14 | 0.000 | 0.000 | 0.047 | 0.024 | 0.000 | 0.066 | 0.000 | 0.000 | 0.016 | 0.087 | 0.030 | 0.096 | 0.196 |  |  |  |  |  |  |  |
| C15 | 0.000 | 0.000 | 0.004 | 0.000 | 0.007 | 0.000 | 0.032 | 0.000 | 0.000 | 0.024 | 0.014 | 0.034 | 0.048 | 0.162 |  |  |  |  |  |  |
| C16 | 0.000 | 0.023 | 0.047 | 0.000 | 0.000 | 0.012 | 0.007 | 0.077 | 0.154 | 0.000 | 0.024 | 0.068 | 0.015 | 0.087 | 0.117 |  |  |  |  |  |
| C17 | 0.037 | 0.045 | 0.023 | 0.000 | 0.000 | 0.080 | 0.000 | 0.000 | -0.002 | 0.121 | 0.042 | 0.068 | 0.000 | 0.019 | 0.004 | 0.000 |  |  |  |  |
| C18 | 0.086 | 0.000 | 0.058 | 0.038 | 0.016 | 0.095 | 0.033 | 0.016 | 0.020 | 0.067 | 0.041 | 0.134 | 0.010 | 0.085 | 0.000 | 0.106 | 0.251 |  |  |  |
| C19 | 0.000 | 0.000 | 0.008 | 0.082 | 0.000 | 0.000 | 0.009 | 0.014 | 0.065 | 0.046 | 0.000 | 0.012 | 0.018 | 0.079 | 0.410 | 0.042 | 0.070 | 0.094 |  |  |
| C20 | -0.023 | 0.050 | 0.037 | -0.039 | -0.026 | -0.006 | 0.000 | 0.013 | 0.096 | 0.049 | 0.010 | 0.000 | 0.021 | 0.000 | 0.036 | 0.314 | 0.068 | 0.028 | 0.144 |  |

Note: The edge weights were estimated using the “estimateNetwork” function from the “bootnet” package.

Table 2S Edge weights of depressive symptom network from the second round

|  | C1 | C2 | C3 | C4 | C5 | C6 | C7 | C8 | C9 | C10 | C11 | C12 | C13 | C14 | C15 | C16 | C17 | C18 | C19 | C20 |
| --- | --- | --- | --- | --- | --- | --- | --- | --- | --- | --- | --- | --- | --- | --- | --- | --- | --- | --- | --- | --- |
| C1 |  |  |  |  |  |  |  |  |  |  |  |  |  |  |  |  |  |  |  |  |
| C2 | 0.129 |  |  |  |  |  |  |  |  |  |  |  |  |  |  |  |  |  |  |  |
| C3 | 0.155 | 0.136 |  |  |  |  |  |  |  |  |  |  |  |  |  |  |  |  |  |  |
| C4 | 0.115 | 0.027 | 0.096 |  |  |  |  |  |  |  |  |  |  |  |  |  |  |  |  |  |
| C5 | 0.090 | 0.027 | 0.020 | 0.142 |  |  |  |  |  |  |  |  |  |  |  |  |  |  |  |  |
| C6 | 0.159 | 0.059 | 0.105 | 0.068 | 0.057 |  |  |  |  |  |  |  |  |  |  |  |  |  |  |  |
| C7 | 0.023 | 0.030 | 0.043 | 0.085 | 0.216 | 0.144 |  |  |  |  |  |  |  |  |  |  |  |  |  |  |
| C8 | 0.000 | 0.004 | 0.011 | 0.104 | 0.120 | 0.033 | 0.121 |  |  |  |  |  |  |  |  |  |  |  |  |  |
| C9 | 0.000 | 0.000 | 0.019 | 0.088 | 0.003 | 0.016 | 0.087 | 0.427 |  |  |  |  |  |  |  |  |  |  |  |  |
| C10 | 0.008 | 0.029 | 0.034 | 0.045 | 0.011 | 0.044 | 0.068 | 0.020 | 0.084 |  |  |  |  |  |  |  |  |  |  |  |
| C11 | 0.032 | 0.128 | 0.023 | 0.000 | 0.103 | 0.019 | 0.043 | 0.000 | 0.000 | 0.054 |  |  |  |  |  |  |  |  |  |  |
| C12 | 0.107 | 0.007 | 0.044 | 0.011 | 0.003 | 0.223 | 0.059 | 0.003 | 0.027 | 0.070 | 0.084 |  |  |  |  |  |  |  |  |  |
| C13 | 0.000 | 0.036 | 0.007 | 0.000 | 0.020 | 0.032 | 0.034 | 0.000 | 0.000 | 0.025 | 0.077 | 0.086 |  |  |  |  |  |  |  |  |
| C14 | 0.000 | 0.000 | 0.054 | 0.022 | 0.000 | 0.068 | 0.000 | 0.000 | 0.008 | 0.084 | 0.013 | 0.103 | 0.171 |  |  |  |  |  |  |  |
| C15 | 0.000 | 0.000 | 0.021 | 0.006 | 0.006 | 0.000 | 0.022 | 0.000 | 0.013 | 0.028 | 0.012 | 0.030 | 0.063 | 0.152 |  |  |  |  |  |  |
| C16 | 0.000 | 0.029 | 0.042 | 0.000 | 0.000 | 0.000 | 0.014 | 0.058 | 0.170 | 0.018 | 0.017 | 0.046 | 0.026 | 0.092 | 0.095 |  |  |  |  |  |
| C17 | 0.051 | 0.039 | 0.023 | 0.010 | 0.000 | 0.069 | 0.000 | 0.000 | -0.007 | 0.112 | 0.043 | 0.082 | 0.000 | 0.027 | 0.009 | 0.000 |  |  |  |  |
| C18 | 0.077 | 0.000 | 0.063 | 0.038 | 0.031 | 0.081 | 0.042 | 0.024 | 0.018 | 0.065 | 0.045 | 0.138 | 0.017 | 0.073 | 0.000 | 0.084 | 0.214 |  |  |  |
| C19 | 0.000 | 0.000 | 0.000 | 0.068 | 0.000 | 0.000 | 0.006 | 0.000 | 0.054 | 0.036 | 0.000 | 0.009 | 0.000 | 0.098 | 0.436 | 0.058 | 0.070 | 0.102 |  |  |
| C20 | -0.026 | 0.017 | 0.050 | -0.032 | -0.037 | 0.000 | 0.001 | 0.000 | 0.106 | 0.052 | 0.007 | 0.000 | 0.032 | 0.002 | 0.030 | 0.314 | 0.062 | 0.017 | 0.144 |  |

Note: The edge weights were estimated using the “estimateNetwork” function from the “bootnet” package.

Table 3S The expected influence indices from the two rounds

| Nodes | EI of the first round | EI of the second round |
| --- | --- | --- |
| C1 | 0.884 | 0.921 |
| C2 | 0.670 | 0.699 |
| C3 | 0.931 | 0.946 |
| C4 | 0.836 | 0.893 |
| C5 | 0.714 | 0.812 |
| C6 | 1.177 | 1.179 |
| C7 | 1.007 | 1.038 |
| C8 | 0.940 | 0.926 |
| C9 | 1.134 | 1.115 |
| C10 | 0.891 | 0.886 |
| C11 | 0.677 | 0.699 |
| C12 | 1.130 | 1.134 |
| C13 | 0.592 | 0.626 |
| C14 | 0.997 | 0.966 |
| C15 | 0.892 | 0.923 |
| C16 | 1.094 | 1.064 |
| C17 | 0.824 | 0.804 |
| C18 | 1.176 | 1.132 |
| C19 | 1.092 | 1.080 |
| C20 | 0.771 | 0.739 |

Note: EI, expected influence (raw-score).
